# Supplementary material
Source: PubMed Central journal article supplement (PMC5010094)
Supplement: NIHMS803199-supplement-Supplemental_Material.pdf [file NIHMS803199-supplement-Supplemental_Material.pdf]

## **SUPPLEMENTAL MATERIAL**

**Supplemental Methods**

**Supplemental Table 1**

**Supplemental Table 2**

**Supplemental Table 3**

**Supplemental Figures and Legends**

**Supplemental References**

This supplemental material has been provided by the authors to give readers additional information about their work.

## Supplemental Methods

### Covariates

Measurements followed similar protocols in both the ARIC Study and the CHS. At baseline, study participants provided information on education, race, smoking status, and prevalence of CHD. In the ARIC Study, prevalent CHD was defined if self-reported based on a previous physician-diagnosis or by the presence of previous myocardial infarction on ECG. Incident CHD was adjudicated by the ARIC Morbidity and Mortality Classification Committee as previously described.<sup>1</sup> In the CHS, prevalent CHD was defined as a positive history for MI, coronary revascularization, or angina using information from self-report and hospitalization records. A physical examination collected information on height and weight, and blood pressure was measured with a random-zero sphygmomanometer. Fasting glucose and lipids were measured from blood samples obtained during the exam. Diabetes was defined as a fasting glucose level of  $\geq 126$  mg/dl, use of an oral hypoglycemic agent or insulin, or in addition, in the ARIC Study, a non-fasting glucose of  $\geq 200$  mg/dl or a self-reported medical diagnosis of diabetes. In the ARIC Study and the CHS, hypertension was defined as use of medication to treat high blood pressure, systolic blood pressure  $\geq 140$  mm Hg, or diastolic blood pressure  $\geq 90$  mm Hg. In ARIC, heart failure at baseline was defined as the reported use of medications to treat heart failure in the previous 2 weeks or the presence of heart failure according to Gothenburg criteria; incident heart failure during follow-up was defined as the presence of ICD-9-CM code 428 in any hospitalization or death certificate.<sup>2</sup> In CHS, heart failure confirmation required, in addition to physician diagnosis, one of the following: 1) documented heart failure symptoms (e.g., shortness of breath, fatigue, orthopnea, paroxysmal nocturnal dyspnea) and physical signs (e.g., edema, pulmonary rales, gallop rhythm) consistent with heart failure; 2) supporting clinical findings such as pulmonary edema on chest x-ray; or 3) therapy for heart failure, including diuretics, digitalis, angiotensin-converting enzyme inhibitors, or beta-blockers.

In ARIC, serum creatinine was assessed in 99% of subjects at their initial visit, while in CHS it was assessed in 97% subjects.<sup>3</sup> Kidney function was assessed by calculation of the estimated GFR (eGFR)

using the abbreviated Modification of Diet in Renal Disease (MDRD) Study equation: (eGFR (ml/min per 1.73 m<sup>2</sup>) = 186.3\*(serum creatinine in mg/dl<sup>-1.154</sup>)\*(age<sup>-0.203</sup>)\*(0.742 if female)\*(1.21 if black). Details about medication use were previously described for the CHS<sup>4</sup> and the ARIC Study.<sup>5</sup> Framingham risk score variables were obtained in both cohorts and included age, sex, total cholesterol, HDL cholesterol, blood pressure, diabetes, and smoking.<sup>6</sup>

### **Reader Agreement for LV Ejection Fraction and Segmental Wall Motion Scoring**

To assess interreader and intrareader agreement for LV ejection fraction and segmental wall motion measurements,  $\kappa$  statistics and the percentage of agreement were calculated. For LV ejection fraction, 339 paired studies were read for assessment of interreader agreement and 310 paired studies for intrareader agreement. In addition, 477 and 239 paired studies were read for assessment of interreader and intrareader agreement, respectively, in scoring LV segmental wall motion. There was agreement on 94% ( $\kappa=0.32$ ) of the paired interreader studies for LV ejection fraction, and the agreement for LV segmental wall motion was 92% ( $\kappa=0.45$ ). The agreement was better for the paired intrareader studies (98% for LV ejection fraction and 95% for segmental wall motion, with  $\kappa=0.82$  and 0.59, respectively).<sup>7</sup>

**Supplemental Table 1.** Non-sudden CVD death rate and hazard ratio (95% confidence interval) by echocardiographic correlates, ARIC, 1993-2002, and CHS 1989-2002

|                      | <b>Mitral Annular Calcification</b> |                        |                       |                                    |                       |         |                       |                       |                       |                      |
|----------------------|-------------------------------------|------------------------|-----------------------|------------------------------------|-----------------------|---------|-----------------------|-----------------------|-----------------------|----------------------|
|                      | ARIC                                |                        |                       | CHS                                |                       |         |                       |                       |                       |                      |
|                      | No                                  | Yes                    | P-value               | No                                 | Yes                   | P-value |                       |                       |                       |                      |
| NSCD cases           | 63                                  | 6                      |                       | 272                                | 325                   |         |                       |                       |                       |                      |
| Person-years         | 16094                               | 791                    |                       | 29696                              | 20089                 |         |                       |                       |                       |                      |
| Model 3: HR (95% CI) | 1 (REF)                             | 1.46<br>(0.63 – 3.38)  | 0.13                  | 1 (REF)                            | 1.81<br>(1.53 – 2.12) | <0.001  |                       |                       |                       |                      |
| Model 4: HR (95% CI) | 1 (REF)                             | 1.04<br>(0.44 – 2.44)  | 0.93                  | 1 (REF)                            | 1.47<br>(1.24 – 1.73) | <0.001  |                       |                       |                       |                      |
|                      | <b>Aortic Sclerosis</b>             |                        |                       |                                    |                       |         |                       |                       |                       |                      |
|                      | ARIC                                |                        |                       | CHS                                |                       |         |                       |                       |                       |                      |
|                      | No                                  | Yes                    | P-value               | No                                 | Yes                   | P-value |                       |                       |                       |                      |
| NSCD cases           | 62                                  | 7                      |                       | 248                                | 325                   |         |                       |                       |                       |                      |
| Person-years         | 16011                               | 879                    |                       | 27318                              | 21277                 |         |                       |                       |                       |                      |
| Model 3: HR (95% CI) | 1 (REF)                             | 1.48<br>(0.68 – 3.25)  | 0.33                  | 1 (REF)                            | 1.76<br>(1.49 – 2.07) | <0.001  |                       |                       |                       |                      |
| Model 4: HR (95% CI) | 1 (REF)                             | 1.15<br>(0.52 – 2.58)  | 0.73                  | 1 (REF)                            | 1.46<br>(1.22 – 1.73) | <0.001  |                       |                       |                       |                      |
|                      | <b>Reduced LV ejection fraction</b> |                        |                       |                                    |                       |         |                       |                       |                       |                      |
|                      | ARIC                                |                        |                       | CHS                                |                       |         |                       |                       |                       |                      |
|                      | No                                  | Yes                    | P-value               | No                                 | Yes                   | P-value |                       |                       |                       |                      |
| NSCD cases           | 52                                  | 17                     |                       | 864                                | 170                   |         |                       |                       |                       |                      |
| Person-years         | 16599                               | 341                    |                       | 58667                              | 4143                  |         |                       |                       |                       |                      |
| Model 3: HR (95% CI) | 1 (REF)                             | 8.96<br>(4.76 – 16.88) | <0.0001               | 1 (REF)                            | 2.14<br>(1.80 – 2.54) | <0.001  |                       |                       |                       |                      |
| Model 4: HR (95% CI) | 1 (REF)                             | 4.61<br>(2.40 – 8.85)  | <0.0001               | 1 (REF)                            | 1.62<br>(1.33 – 1.97) | <0.001  |                       |                       |                       |                      |
|                      | <b>Left atrium diameter</b>         |                        |                       |                                    |                       |         |                       |                       |                       |                      |
|                      | ARIC tertiles (cm)                  |                        |                       | CHS tertiles (cm)                  |                       |         |                       |                       |                       |                      |
|                      | <3.62                               | 3.62 – 4.05            | >4.05                 | Continuous per 1 SD                | P-value <sup>+</sup>  | <3.60   | 3.60 – 4.13           | >4.13                 | Continuous per 1 SD   | P-value <sup>+</sup> |
| NSCD cases           | 13                                  | 7                      | 33                    |                                    |                       | 281     | 286                   | 435                   |                       |                      |
| Person-years         | 4578                                | 4566                   | 4628                  |                                    |                       | 20881   | 20997                 | 19031                 |                       |                      |
| Model 3: HR (95% CI) | 1 (REF)                             | 0.48<br>(0.19 – 1.21)  | 1.94<br>(1.01 – 3.74) | 1.65<br>(1.31 – 2.09)              | <0.0001               | 1 (REF) | 0.94<br>(0.79 – 1.10) | 1.37<br>(1.17 – 1.59) | 1.25<br>(1.17 – 1.34) | <0.01                |
| Model 4: HR (95% CI) | 1 (REF)                             | 0.47<br>(0.19 – 1.18)  | 1.67<br>(0.86 – 3.25) | 1.51<br>(1.18 – 1.92)              | 0.0008                | 1 (REF) | 0.90<br>(0.76 – 1.06) | 1.08<br>(0.92 – 1.27) | 1.06<br>(0.99 – 1.14) | 0.08                 |
|                      | <b>Aortic root diameter</b>         |                        |                       |                                    |                       |         |                       |                       |                       |                      |
|                      | ARIC tertiles (cm)                  |                        |                       | CHS tertiles (cm)                  |                       |         |                       |                       |                       |                      |
|                      | <2.92                               | 2.92 – 3.29            | >3.29                 | Continuous per 1 SD                | P-value <sup>+</sup>  | <2.96   | 2.96 – 3.35           | >3.35                 | Continuous per 1 SD   | P-value <sup>+</sup> |
| NSCD cases           | 16                                  | 24                     | 21                    |                                    |                       | 285     | 346                   | 374                   |                       |                      |
| Person-years         | 5190                                | 4977                   | 5146                  |                                    |                       | 21487   | 20747                 | 18791                 |                       |                      |
| Model 3: HR (95% CI) | 1 (REF)                             | 1.35<br>(0.72 – 2.55)  | 1.12<br>(0.58 – 2.15) | 1.06<br>(0.82 – 1.36)              | 0.66                  | 1 (REF) | 1.13<br>(0.96 – 1.32) | 1.14<br>(0.97 – 1.34) | 1.06<br>(1.00 – 1.13) | 0.07                 |
| Model 4: HR (95% CI) | 1 (REF)                             | 1.25<br>(0.66 – 2.36)  | 0.75<br>(0.38 – 1.49) | 0.93<br>(0.71 – 1.20)              | 0.57                  | 1 (REF) | 1.08<br>(0.92 – 1.28) | 1.13<br>(0.96 – 1.34) | 1.05<br>(0.98 – 1.12) | 0.18                 |
|                      | <b>LV mass index</b>                |                        |                       |                                    |                       |         |                       |                       |                       |                      |
|                      | ARIC tertiles (g/m <sup>2.7</sup> ) |                        |                       | CHS tertiles (g/m <sup>2.7</sup> ) |                       |         |                       |                       |                       |                      |
|                      | <41.4                               | 41.4 – 53.1            | >53.1                 | Continuous per 1 SD                | P-value <sup>+</sup>  | <33.07  | 33.07 – 42.20         | >42.20                | Continuous per 1 SD   | P-value <sup>+</sup> |
| NSCD cases           | 8                                   | 6                      | 30                    |                                    |                       | 148     | 188                   | 297                   |                       |                      |
| Person-years         | 4272                                | 4305                   | 4327                  |                                    |                       | 15391   | 15002                 | 13197                 |                       |                      |
| Model 3: HR (95% CI) | 1 (REF)                             | 0.63<br>(0.22 – 1.83)  | 2.22<br>(0.97 – 5.05) | 1.19<br>(0.94 – 1.49)              | 0.15                  | 1 (REF) | 1.30<br>(1.04 – 1.61) | 2.05<br>(1.68 – 2.50) | 1.46<br>(1.37 – 1.56) | <0.001               |
| Model 4: HR (95% CI) | 1 (REF)                             | 0.65<br>(0.22 – 1.88)  | 1.90<br>(0.84 – 4.30) | 1.16<br>(0.91 – 1.49)              | 0.22                  | 1 (REF) | 1.13<br>(0.90 – 1.41) | 1.34<br>(1.08 – 1.65) | 1.18<br>(1.09 – 1.28) | <0.001               |

|              | <b>Mitral E to A</b> |            |               |               |            |               |
|--------------|----------------------|------------|---------------|---------------|------------|---------------|
|              | ARIC (m/s)           |            |               | CHS (m/s)     |            |               |
|              | <0.70                | 0.70 – 1.5 | >1.5          | <0.70         | 0.70 – 1.5 | >1.5          |
| NSCD cases   | 9                    | 35         | 9             | 281           | 619        | 85            |
| Person-years | 1270                 | 13294      | 1030          | 10106         | 47699      | 3170          |
| Model 3: HR  | 1.29                 | 1 (REF)    | 4.18          | 2.18          | 1 (REF)    | 1.87          |
| (95% CI)     | (0.60 – 2.81)        |            | (1.98 – 8.82) | (1.89 – 2.52) |            | (1.48 – 2.35) |
| Model 4: HR  | 0.96                 | 1 (REF)    | 3.37          | 1.73          | 1 (REF)    | 1.40          |
| (95% CI)     | (0.42 – 2.18)        |            | (1.57 – 7.25) | (1.49 – 2.01) |            | (1.08 – 1.82) |

  

|             | <b>Mitral Peak E</b> |                      |                     |                      |
|-------------|----------------------|----------------------|---------------------|----------------------|
|             | ARIC (m/s)           |                      | CHS (m/s)           |                      |
|             | Continuous per 1 SD  | P-value <sup>+</sup> | Continuous per 1 SD | P-value <sup>+</sup> |
| Model 3: HR | 1.30                 | 0.03                 | 1.04                | 0.520                |
| (95% CI)    | (1.02 – 1.65)        |                      | (0.92 – 1.18)       |                      |
| Model 4: HR | 1.28                 | 0.03                 | 1.04                | 0.514                |
| (95% CI)    | (1.02 – 1.61)        |                      | (0.92 – 1.18)       |                      |

ARIC=Atherosclerosis Risk in Communities Study; CHD=coronary heart disease; CHS=Cardiovascular Health Study; CVD=cardiovascular disease; eGFR=estimated glomerular filtration rate; HDLc=high density lipoprotein cholesterol; LV=left ventricular; NSCD=non-sudden CVD death

+P-value is for continuous variable, per 1 SD

Model 3: Cox proportional hazards model adjusting for Framingham risk score as one variable: (sex, age, total cholesterol, HDLc, blood pressure, diabetes and smoking), and also prevalent CHD + eGFR

Model 4: Model 3 + time-dependent heart failure, time-dependent CHD

**Supplemental Table 2.** SCD hazard ratios (95% confidence interval) by continuous variable using select echocardiographic variables from Table 3.

| <b>Left atrium diameter</b> |                                 |                            |                                |                            |
|-----------------------------|---------------------------------|----------------------------|--------------------------------|----------------------------|
|                             | <b>ARIC (cm)</b>                |                            | <b>CHS (cm)</b>                |                            |
|                             | <b>Continuous, per 1 SD</b>     | <b>p-value<sup>+</sup></b> | <b>Continuous, per 1 SD</b>    | <b>p-value<sup>+</sup></b> |
| Model 1: HR (95% CI)        | 1.48 (1.10 – 1.99)              | 0.01                       | 1.24 (1.09 – 1.40)             | 0.001                      |
| Model 2: HR (95% CI)        | 1.38 (1.02 – 1.88)              | 0.04                       | 1.19 (1.05 – 1.35)             | 0.007                      |
| Model 3: HR (95% CI)        | 1.34 (0.99 – 1.83)              | 0.06                       | 1.18 (1.04 – 1.34)             | 0.009                      |
| Model 4: HR (95% CI)        | 1.24 (0.92 – 1.66)              | 0.16                       | 1.13 (0.99 – 1.29)             | 0.07                       |
| <b>Aortic root diameter</b> |                                 |                            |                                |                            |
|                             | <b>ARIC (cm)</b>                |                            | <b>CHS (cm)</b>                |                            |
|                             | <b>Continuous, per 1 SD</b>     | <b>p-value<sup>+</sup></b> | <b>Continuous, per 1 SD</b>    | <b>p-value<sup>+</sup></b> |
| Model 1: HR (95% CI)        | 1.38 (1.00 – 1.90)              | 0.05                       | 1.02 (0.89 – 1.17)             | 0.77                       |
| Model 2: HR (95% CI)        | 1.40 (1.07 – 1.85)              | 0.02                       | 1.12 (0.99 – 1.27)             | 0.07                       |
| Model 3: HR (95% CI)        | 1.37 (1.03 – 1.81)              | 0.03                       | 1.12 (0.99 – 1.27)             | 0.08                       |
| Model 4: HR (95% CI)        | 1.28 (0.95 – 1.73)              | 0.10                       | 1.07 (0.94 – 1.22)             | 0.32                       |
| <b>LV mass index</b>        |                                 |                            |                                |                            |
|                             | <b>ARIC (g/m<sup>2.7</sup>)</b> |                            | <b>CHS (g/m<sup>2.7</sup>)</b> |                            |
|                             | <b>Continuous, per 1 SD</b>     | <b>p-value<sup>+</sup></b> | <b>Continuous, per 1 SD</b>    | <b>p-value<sup>+</sup></b> |
| Model 1: HR (95% CI)        | 1.50 (1.20 – 1.88)              | 0.0004                     | 1.51 (1.33 – 1.70)             | <0.001                     |
| Model 2: HR (95% CI)        | 1.31 (1.04 – 1.64)              | 0.02                       | 1.38 (1.22 – 1.57)             | <0.001                     |
| Model 3: HR (95% CI)        | 1.28 (1.01 – 1.63)              | 0.04                       | 1.38 (1.22 – 1.57)             | <0.001                     |
| Model 4: HR (95% CI)        | 1.29 (1.01 – 1.66)              | 0.04                       | 1.31 (1.13 – 1.53)             | 0.001                      |

ARIC=Atherosclerosis Risk in Communities Study; CHD=coronary heart disease; CHS=Cardiovascular Health

Study; eGFR=estimated glomerular filtration rate; HDLc=high density lipoprotein cholesterol; SCD=sudden cardiac death

+P-value is for continuous variable, per 1 SD

Model 1: Cox proportional hazards model adjusted for age, sex, \*\*race (in CHS only)

Model 2: Cox proportional hazards model adjusting for Framingham risk score as one variable: (sex, age, total cholesterol, HDLc, blood pressure, diabetes and smoking), and also prevalent CHD

Model 3: Model 2 + eGFR

Model 4: Model 3 + time-dependent heart failure, time-dependent CHD

**Supplemental Table 3.** C-statistic of sudden cardiac death with echocardiographic variables added to the Framingham risk score (fractional shortening replacing reduced ejection fraction).

|                                                                       | ARIC C-statistic<br>(95% CI) | CHS C-statistic<br>(95% CI) |
|-----------------------------------------------------------------------|------------------------------|-----------------------------|
| Framingham risk score                                                 | 0.608 (0.526-0.690)          | 0.669 (0.638-0.700)         |
| FRS + Univariate: (each variable added to the score separately)       |                              |                             |
| Mitral annular calcification                                          | 0.648 (0.567-0.729)          | 0.677 (0.633-0.721)         |
| LV fractional shortening, continuous                                  | 0.663 (0.555-0.770)          | 0.654 (0.610-0.699)         |
| Aortic sclerosis                                                      | 0.620 (0.535-0.705)          | 0.671 (0.628-0.714)         |
| Left atrium diameter, continuous                                      | 0.608 (0.522-0.694)          | 0.669 (0.637-0.702)         |
| Left atrium diameter, tertiles                                        | 0.619 (0.537-0.702)          | 0.669 (0.637-0.701)         |
| Aortic root diameter, continuous                                      | 0.682 (0.609-0.756)          | 0.666 (0.635-0.697)         |
| Aortic root diameter, tertiles                                        | 0.637 (0.564-0.710)          | 0.666 (0.635-0.697)         |
| LV mass index, continuous                                             | 0.648 (0.542-0.755)          | 0.687 (0.645-0.728)         |
| LV mass index, tertiles                                               | 0.623 (0.538-0.707)          | 0.670 (0.628-0.712)         |
| Mitral E/A, continuous                                                | 0.629 (0.542-0.715)          | 0.666 (0.634-0.698)         |
| Mitral E/A, categories                                                | 0.633 (0.553-0.713)          | 0.671 (0.639-0.703)         |
| Mitral Peak E, continuous                                             | 0.644 (0.552-0.735)          | 0.668 (0.635-0.700)         |
| FRS + Multivariate: (with fractional shortening replacing reduced EF) | 0.778 (0.669-0.887)          | 0.733 (0.679-0.787)         |

## Supplemental Figures and Legends

### Supplemental Figure 1

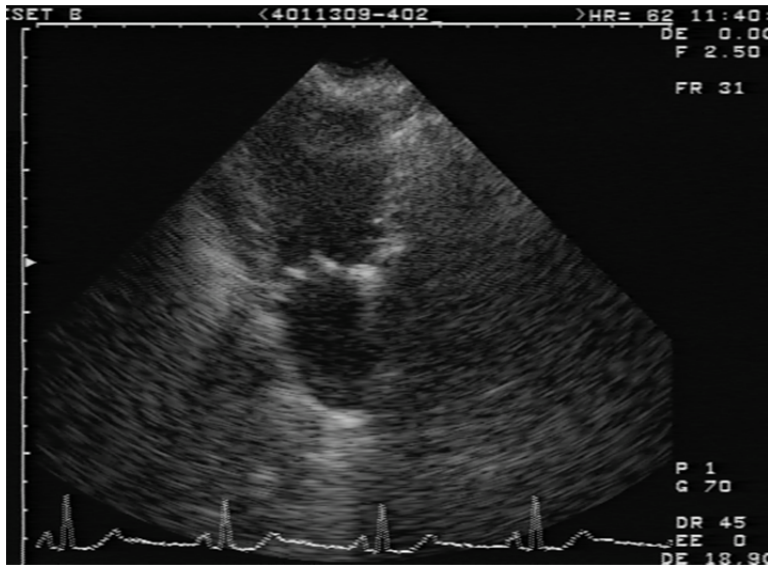

Image demonstrating mitral annular calcification.

### Supplemental Figure 2

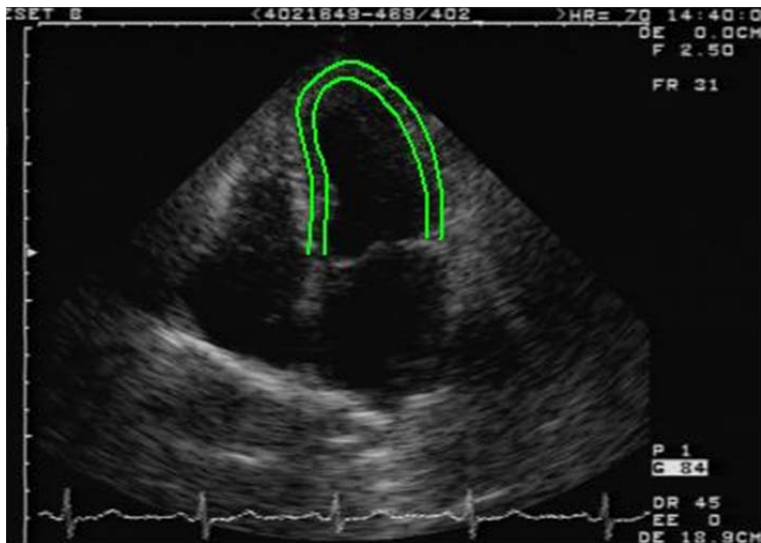

Image demonstrating increased left ventricular mass.



### Supplemental Figure 3

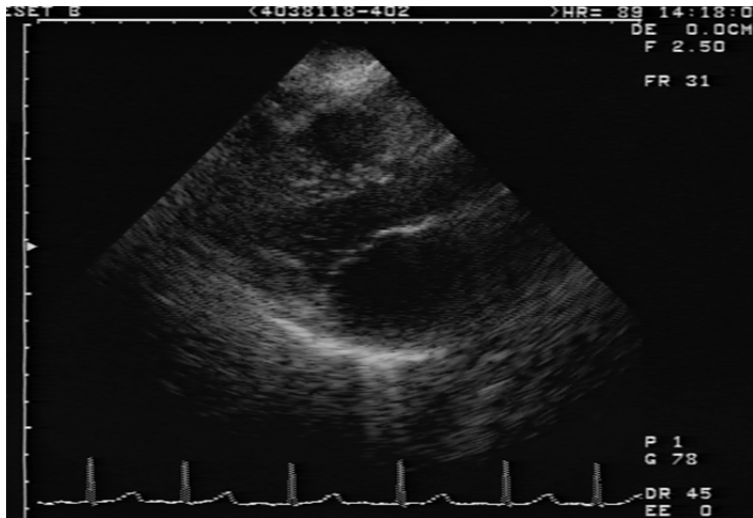

Image demonstrating increased left atrial diameter.

### Supplemental Figure 4

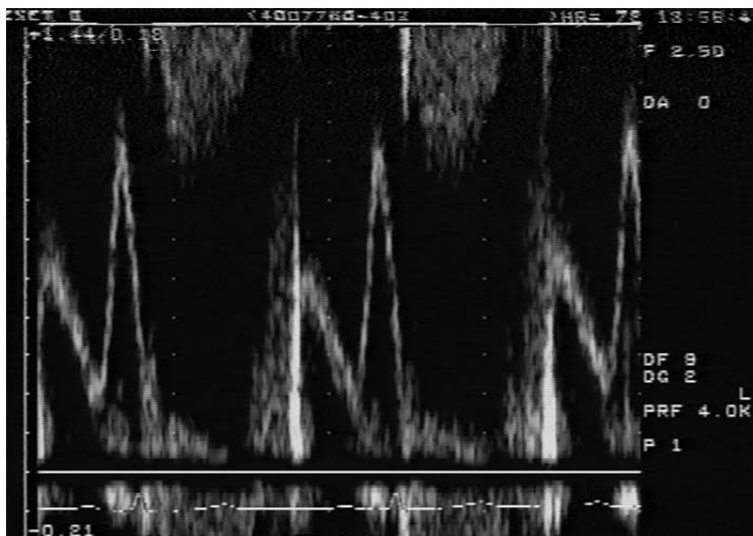

Image demonstrating mitral inflow E/A velocity ratio < 0.7.

Supplemental Figure 5

## Non-Sudden CVD Death

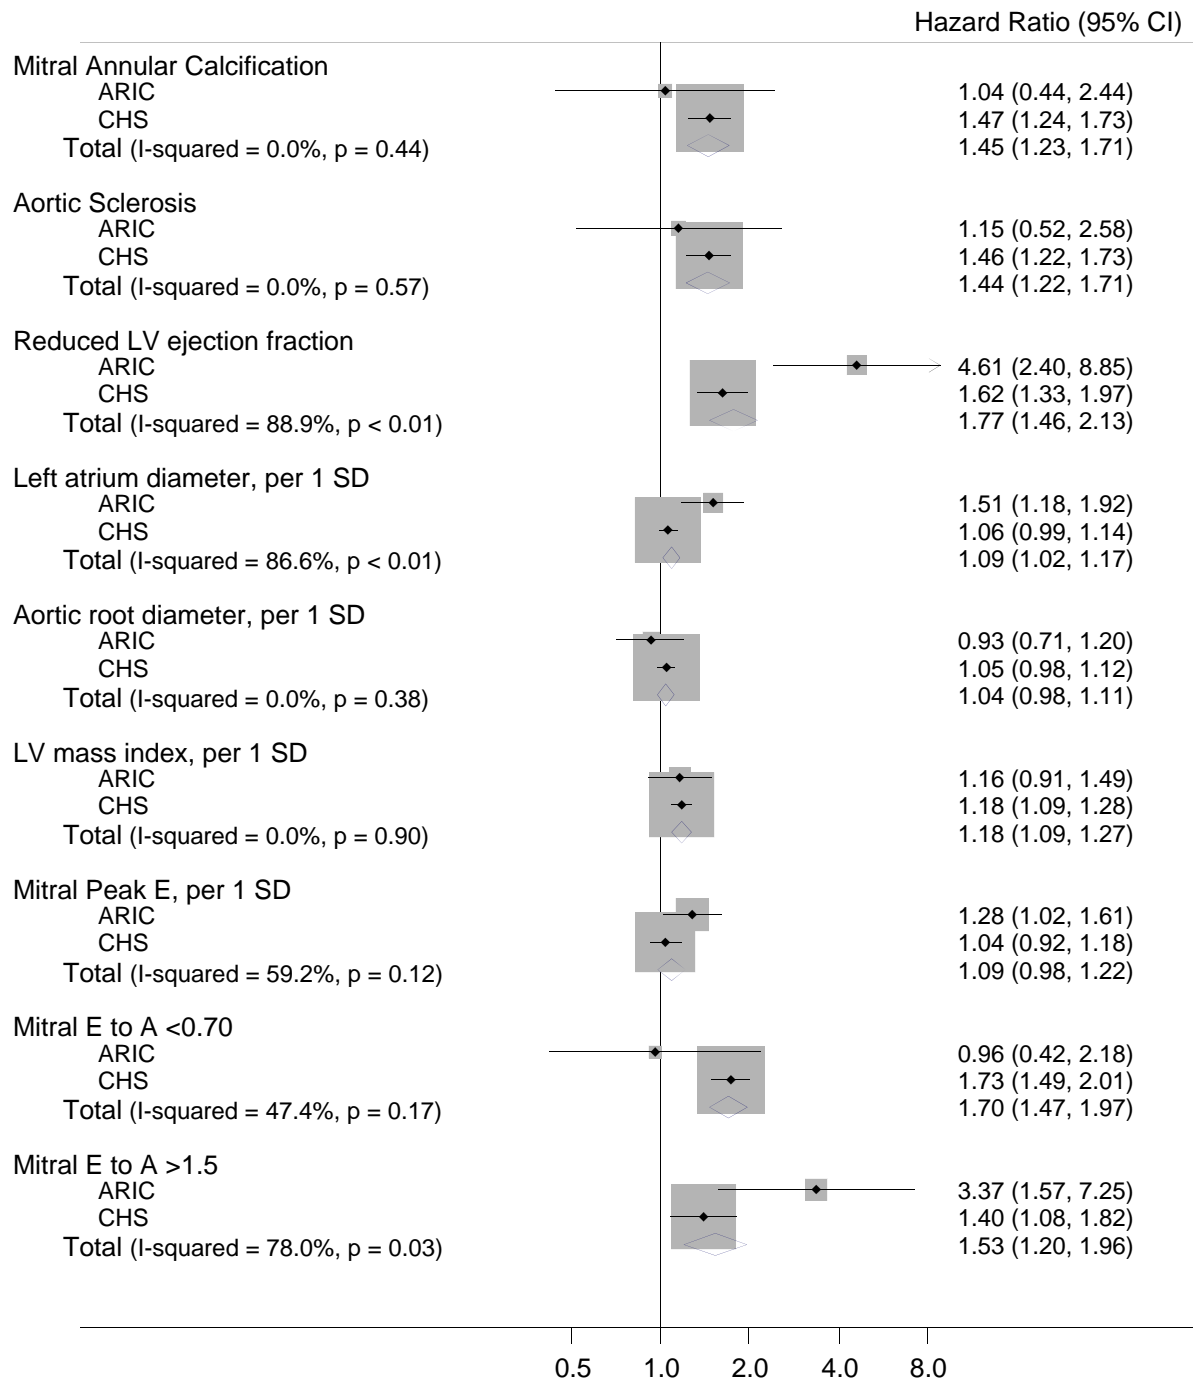

Forest plot of the meta-analyzed and risk-adjusted hazard ratios for non-sudden cardiovascular disease deaths in ARIC and CHS, using CHD and heart failure as time-dependent variables (Model 4)

## Supplemental References

1. White AD, Folsom AR, Chambless LE, Sharret AR, Yang K, Conwill D, Higgins M, Williams OD, Tyroler HA. Community surveillance of coronary heart disease in the Atherosclerosis Risk in Communities (ARIC) Study: methods and initial two years' experience. *J Clin Epidemiol.* 1996;49:223–33.
2. Loehr LR, Rosamond WD, Chang PP, Folsom AR, Chambless LE. Heart failure incidence and survival (from the Atherosclerosis Risk in Communities study). *Am J Cardiol.* 2008;101:1016–22.
3. Weiner DE, Krassilnikova M, Tighiouart H, Salem DN, Levey AS, Sarnak MJ. CKD classification based on estimated GFR over three years and subsequent cardiac and mortality outcomes: a cohort study. *BMC Nephrol.* 2009;10:26.
4. PSATY B. Assessing the use of medications in the elderly: Methods and initial experience in the cardiovascular health study. *J Clin Epidemiol.* 1992;45:683–692.
5. The Atherosclerosis Risk in Communities (ARIC) Study: design and objectives. The ARIC investigators. *Am J Epidemiol.* 1989;129:687–702.
6. Kannel WB, McGee D, Gordon T. A general cardiovascular risk profile: the Framingham Study. *Am J Cardiol.* 1976;38:46–51.
7. Gardin JM, Siscovick D, Anton-Culver H, Lynch JC, Smith VE, Klopfenstein HS, Bommer WJ, Fried L, O'Leary D, Manolio TA. Sex, age, and disease affect echocardiographic left ventricular mass and systolic function in the free-living elderly. The Cardiovascular Health Study. *Circulation.* 1995;91:1739–1748.
